# Supplementary material
Source: PubMed Central journal article supplement (PMC547857)
Supplement: pnas_102_5_1602__1.pdf [file pnas_102_5_1602__1.pdf]

## A Z $\alpha$

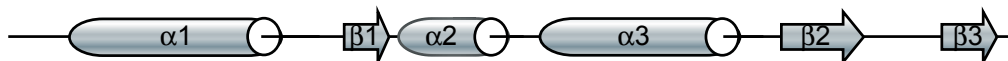

| PKZ | ZBP1 | ADAR1 | E3L | Species               | Residue | Sequence                                                                   | Length |
|-----|------|-------|-----|-----------------------|---------|----------------------------------------------------------------------------|--------|
|     |      |       |     | <i>D. rerio</i>       | 4       | MSAENEI-EMRICDYLRRHG---RSTVQDIFKELKLEKSTVNRHLYSLQASKQVFKTVEDNKRFPVWNLVE--  | 16aa-- |
|     |      |       |     | <i>C. auratus</i>     | 1       | MSAETQM-ERKIIDFLRQNG---KSIALTIAKEIGLDKSTVNRHLYLNQRSNQVFNFSNE--KPPVWDLME--  | 18aa-- |
|     |      |       |     | <i>C. carpio</i>      | 1       | MSADTEI-EKQICDFLRRNG---KSTALKIAKEIRLDRKIVNKHLYILQKSNQMSVTNE--TPPVWDLLE--   | 16aa-- |
|     |      |       |     | <i>H. sapiens</i>     | 8       | PGREGHL-EQRILQVLTAEAG--SPVKLAQLVKECQAPKRELNQVLYRMKKEKLV-SLTS---PATWCLGG--  | 32aa-- |
|     |      |       |     | <i>R. norvegicus</i>  | 8       | LGTGDNL-EQKILQVLS DAG--SPVQIDQLLKKLQVPKKILNQVLYRLKKEGRV-SSPA---PATWSLGG--  | 16aa-- |
|     |      |       |     | <i>M. musculus</i>    | 8       | LSTGDNL-EQKILQVLSDDG--GPVKIGQLVKKCQVPKKTINQVLYRLKKEDRV-SSPE---PATWSIGG--   | 15aa-- |
|     |      |       |     | <i>H. sapiens</i>     | 137     | LSIYQDQ-EQRILKFLLEELGEGKATTAHDLGKLGTPKKEINRVLYSLAKKGLQKEAG--TPPLWKIAV--    | 75aa-- |
|     |      |       |     | <i>R. norvegicus</i>  | 135     | LSISQNP-EQKVLNRLEELGEGKATTAYALARELRTPKDDINRILYSLERKGLHRGCVG--KPPLWLSLVP--  | 40aa-- |
|     |      |       |     | <i>M. musculus</i>    | 135     | LSISQSP-EQKVLNRLEELGEGKATTAHVLAARELRIPKRDINRILYSLERKGLHRGCVG--KPPLWLSLVP-- | 44aa-- |
|     |      |       |     | <i>X. laevis</i>      | 109     | LSVSRDPLENILLTFFRGGQDTQFTTAKALAWQFKVKKKHINRYFLYKFTKGLLCKNSG--TPPLWKISS--   | 42aa-- |
|     |      |       |     | <i>D. rerio</i>       | 251     | LYLTPEI-HQQVCAFLTSLRPAETIQAKVLGKLGPKKIVNKVLYDLLKSNQVVKQGE--TPPLWRLCE--     | 91aa-- |
|     |      |       |     | <i>T. fluviatilis</i> | 163     | ITFTPDI-EQQVHGALLALPKSPDRVPKAWLAKQLHLPKTI VNRALYSLERAQKAFKQGL--SPPLWNACR-- | 67aa-- |
|     |      |       |     | <i>T. rubripes</i>    | 182     | ITLTPDI-QEQVHRALVALKPSDSIAARWLAKKILHLPKIVNKALYSLERTQKASKQGL--SPPLWTTYR--   | 65aa-- |
|     |      |       |     | Vaccinia              | 6       | YIDERSD-AEIVCAAIKNI GIEG-ATAAQLTRQLNMEKREVNKALYDLQRSAMVYSSDD--IPPRWFMTT    |        |
|     |      |       |     | YMTV                  | 6       | CENDVKT-FSLVKNEVMMLNVDEYTTSIDISNKLKINKKKINKQLYKLOKEGVLKMPVS--NPPKWFKNC     |        |
|     |      |       |     | YLDV                  | 7       | TVNDAEIT-FSLVKKEVLSLNTNDYTTAISLSNRLKINKKKINQQLYKLOKEDTVKMPVS--NPPKWFKNY    |        |
|     |      |       |     | Swinepox              | 4       | DISNEDV-YSLVKQEVDSLPGNFITAVEISKKIEKEKSSINRQLYALYQQGYIDMVPA--CPPKWYKRN      |        |
|     |      |       |     | LSDV                  | 3       | SCDEVDS-YELVKKMVMNLSSESEFITAIETSRKLNIEKSNVNKQLYKLHNDGFIFMIRS--NPPKWFKKN    |        |
|     |      |       |     | Orf                   | 1       | -MA-CEC-ASLILELLR--KSDDKLPKQIAKELGISKHEANRQLYRLLDSDVCCEDG--NPPRFVVEC       |        |
|     |      |       |     | BPSV                  | 1       | -MA-CEC-ASLILDLLK--KCGVKLPKADIAKELGISKHEANRYLRLLDTRVVDG--HPPRWYAEAC        |        |
|     |      |       |     | BPSV (BV-AR02)        | 1       | -MASCDR-ESKILTFLS--SSGTPVPAKRVAALGISKHDANRCLYKLLSDAVSCVDG--CPPLWSAPC       |        |

## B Z $\beta$

| PKZ | ZBP1 | ADAR1 | Species               | Residue | Sequence                                                             |
|-----|------|-------|-----------------------|---------|----------------------------------------------------------------------|
|     |      |       | <i>D. rerio</i>       | 86      | MTRDAIEEKHVKDLKSGG-LKASHIASKLGQ-QTQSTNKLLYGLMEKGEVRKCS--KSHMWTLKN    |
|     |      |       | <i>C. auratus</i>     | 83      | TTAETCEEKHVRDLKSGG-LKACQIAKDLGQ-PRKAVNKQLYSMMQTGKVKKCE--ISSLWLLEG    |
|     |      |       | <i>C. carpio</i>      | 81      | TTRDTSEEKRVEDLLMKSGGLKACHIAARDLGQ-SIQTTNKHLYSMMEKRRVQKCS--VSNLWSLNG  |
|     |      |       | <i>H. sapiens</i>     | 103     | EDIYRFLLKDNQGRALVIAQALGMRATAKD VNRDLYRMKSRHLLDMDE--QSKAWTIYR         |
|     |      |       | <i>R. norvegicus</i>  | 87      | AQPS--LEERILRFLETQGPQALHIAKALGMTTAKEVNPILYSMRNKHLLTVS---DTQMWTIYR    |
|     |      |       | <i>M. musculus</i>    | 86      | AQPS--LDERILRFLEANGPHRALHIAKALGMTTAKEVNPILYSMRNKHLLSY---DQQTWKIYH    |
|     |      |       | <i>H. sapiens</i>     | 293     | FLDMAEIKEKICDYLFNVSDSSALNLAKNIGLTKARDINAVLIDMERQGDVYRQG-TTPPIWHLTD   |
|     |      |       | <i>R. norvegicus</i>  | 243     | FLDMAEIKEKICDYLFNVSDSSALNLAKNIGLAKARDVNAVLDLERQGDVYRQG-ATPPIWHLTD    |
|     |      |       | <i>M. musculus</i>    | 246     | PLDMAEIKEKICDYLFNVSNSSALNLAKNIGLTKARDVTSVLDLERQGDVYRQG-ATPPIWYLTD    |
|     |      |       | <i>X. laevis</i>      | 215     | PEDMATNSAKVCEFLYNSPSTPFIIRKNVGISKMPELTQILNTLEKQGEACKAS-TNPVKWTLTA    |
|     |      |       | <i>D. rerio</i>       | 409     | MADSKDSKEKILQYLYEAGTGNALVI AKNLGLRS AKQVNPTLYALEKQGDVNRNTEVNPPTWELSA |
|     |      |       | <i>T. fluviatilis</i> | 297     | LASKMPDQKELVNLHLLNAGETTALCIAKNLGLKTAKQVNPTLYSLEKQGDVVIKHGEVTPPTWELAT |
|     |      |       | <i>T. rubripes</i>    | 315     | TSTMSDQKELVNLHLYLFNSGETTALCIAKNLGLKTTKQINPTLYTLEKQGDVIKHSVTPATWELAT  |
