# Supplementary material
Source: PubMed Central journal article supplement (PMC547857)
Supplement: pnas_102_5_1602__5.pdf [file pnas_102_5_1602__5.pdf]

TGGCCTACTGGAGAAGAGTTTACAGCCAGCTGACCCGCTGACGGGCGAAAGTAAGCAGGAATCGAAACCGAAAGCTAAACAAGCCTT 87

CTTTAACACGAGAATCTGGGCGTTTTTGGACTCTAGGTTGATCAGAGGAGGTAGAATACAACATTCTGACAAACAAAATGGCAAAAA 174

(M) A K

TGTCGCGAGAAAATGAAATAGAGATGAGAATCTGTGATTACCTGAGGAGACACGGCAGGAGCACCGTACAGGACATTTTCAAGGAAT 261  
M S A E N E I E M R I C D Y L R R H G R S T V Q D I F K E

TAAAAATTAGAGAAAATCCACCGTGAACAGGCATCTATACAGCCTACAGGCGTCAAAGCAGGTTTTTAAAACGTGGGAAGATAATAAGC 348  
L K L E K S T V N R H L Y S L Q A S K Q V F K T V E D N K

GGCCGGTCTGGGATCTGGTGGAGAGCATGAATGACGAACAAAAAGCCAAACCAGAGCAAATAAAGCCCGAGATGACAAGAGACGCAA 435  
R P V W D L V E S M N D E Q K A K P E Q I K P E M T R D A

TTGAAGAAAAACATGTGAAGGATCTGCTGAAATCAGGAGGTTTTAAAAGCCTCTCATATCGCCAGCAAACACTGGGACAACAAACACAAT 522  
I E E K H V K D L L K S G G L K A S H I A S K L G Q Q T Q

CAACTAACAAACTACTGTACGGTTTTGATGGAGAAAGGTGAAGTGCGCCAAATGCAGTAAAAGCCACATGTGGACTCTGAAAAATGACC 609  
S T N K L L Y G L M E K G E V R K C S K S H M W T L K N D

AGGAGAGGAATGGAAGTGGCAGTGATCGCAAACACTGACTTCAGTTTTAGGGATGTCTCAAACCTTTTGATGTGATCGCAGAGCTTGGTG 696  
Q E R N G S G S D R K L T S V S G M S Q T F D V I A E L G

ACGGAGGCTATGGTTTTGTTTGCAAAGTAAAACATAAGATTGATGACAAGATCTATGCTGTGAAGAGAGTCGAGTTCAACAGTGAAG 783  
D G G Y G F V C K V K H K I D D K I Y A V K R V E F N S E

CTGAACCTGAGGTGAAGGCATTGGCTCGACTAGATCACCCAAACATAGTGCCTACTTCACATGCTGGCCTGATTCTGACAACCTGGA 870  
A E P E V K A L A R L D H P N I V R Y F T C W P D S D N W

TGTCAAATCAAGAAACAACGAAAAGTCAAACACAACAGTTTCTTCAACTGACACTGATGATACTAATGAGAGAAGCGCTAGTGATG 957  
M S N Q E T N E K S N T T G S S T D T D D T N E R S A S D

ATGATGATGATGATGATGATGATGATGATGAAGATGATGATGTCAGTGATGATGTCACGTTAGGAATGGAAAGTCTGACTTTTACAGAAT 1044  
D D D D D D D D D E D D D V S D D V T L G M E S L T F T E

CGACATCTGCTGCTAAAGCCAGTGGACAGTGTGATCCTACAAATCACAGGACATATTTATTTATTCAGATGGAGTTTTGTGAGGGAG 1131  
S T S A A K A S G Q C D P T N H R T Y L F I Q M E F C E G

GAACACTGACGTCATGGATAGGGGAGAGAAATTACGGAGGAAAACAGAGAATCCCTCTGGAAATCCATCGGATATTTTATGAGATCA 1218  
G T L T S W I G E R N Y G G K Q R I P L E I H R I F Y E I

GCAGTGGGGTGGAGTACATCCATTCAAACAATCTCATCCACAGAGACTTGAAGCCTGATAACATATTGTTTAAATGACGGCAAAGTGA 1305  
S S G V E Y I H S N N L I H R D L K P D N I L F N D G K V

AGATTGGAGATTTTGGGTTGGTGGCGGCTCAGAAGAAATCCAGTGGTGACCCTATAGAGCGGTCAAAGAGGAAGGGCACACCCACAT 1392  
K I G D F G L V A A Q K N P S G D P I E R S K R K G T P T

ATATGAGTCTGAACAGGAAAATCTGAGGAATTACGATGAAAAGACAGACATTTTTCCCTTGGACTGATGTGGTTTGAATGCTGT 1479  
Y M S P E Q E N L R N Y D E K T D I F P L G L M W F E M L

GGAAAAATATCTTCTGGGATGGAGAGAGCAGAGATCTGGACAAATTTGAGAAATCAAAGCTTCCCTGACCAGTTTTGTGAGAGATATT 1566  
W K I S S G M E R A E I W T N L R N Q K L P D Q F C E R Y

CAGCTGAAAATAAATTCATAGAGAAGATGCTGTCCGTGACACCAGAGGACAGGCCGACGCTAAAGACATCAGACTAAATCTGGAGA 1653  
S A E N K F I E K M L S V T P E D R P H A K D I R L N L E

CGTTTTTCTCTTTGCATCAAACAGCTTGAGTCAGAAAACATCTGACTCTTTTGTGTCTGTTTGGTTGGATGATAATGGTTTTCT 1740  
T F F S L H Q N S L S Q K T I .

GCAGAGCACTTTTAAAGATTTTACTGGTTTATTCATGGTTTAAATGAACTGTTTAAATGCTGGGATTTGCAAACCTGGGCAGCAGAATAA 1827

TATCAGGTGGTCCATGGAAAAGTTTGGCAATAAAATAAAATTTTAAATGCATAAAAAAAAAAAAAAAAAAAAAAAAAAAAAA 1904
