# Supplementary material
Source: PubMed Central journal article supplement (PMC547857)
Supplement: pnas_102_5_1602__7.pdf [file pnas_102_5_1602__7.pdf]

PKZa Va 1 MAKMSAENEIEMRICDYLRHGRSTVQDIFKELKLEKSTVNRHLYSLQASKQVFKTVEDNKRVPVWDLVESMNDEQKAKPEQIKPEM  
PKZb Va 1 .....N.....  
PKZc Va 1 .....N.....  
PKZd Va 1 .....  
PKZe Va 1 .....  
PKZf Va 1 .....  
PKZg Va 1 .....  
PKZh Vb 1 .....  
PKZi Vd 1 .....  
PKZc Vd 1 .....N.....  
PKZh Vc 1 .....--.....

PKZa Va 87 TRDAIEEKHVKDLLKSGGLKASHIASKLGQQTQSTNKLLYGLMEKGEVRKCSKSHMWTLKNDQERNNGSGDRKLTSSVSGMSQTFDV  
PKZb Va 87 .....  
PKZc Va 87 .....  
PKZd Va 87 .....  
PKZe Va 87 .....  
PKZf Va 87 .....  
PKZg Va 87 .....  
PKZh Vb 85 .....  
PKZi Vd 87 .....  
PKZc Vd 87 .....  
PKZh Vc 85 .....--.....

PKZa Va 173 IAELGDGGYGFVCKVKHKIDDKIYAVKRVEFNSEAEPEVKALARLDHPNIVRYFTCPDSDNWMNSQETNEKSNTTGSSTDTDDTN  
PKZb Va 173 .E.....  
PKZc Va 173 .E.....P.....  
PKZd Va 173 .E...R.....  
PKZe Va 173 .E.....  
PKZf Va 173 .E.....P.....  
PKZg Va 173 .E.....  
PKZh Vb 171 .E.....-----  
PKZi Vd 173 .E.....K.....  
PKZc Vd 173 .E.....P.....K.....  
PKZh Vc 171 .E.....K.....

PKZa Va 259 ERSASDDDDDDDDDDDDVSDDVTLGMESLTFTESTSAAKASQCPTNHRTYLFIQMEFCEGGTLTSWIGERNYGGKQRIPLEI  
PKZb Va 259 .....VA..E..D.....  
PKZc Va 259 .....----.E.D.....R.....  
PKZd Va 259 .....VA..E..D.....R.....  
PKZe Va 259 .....VA..E..D.....R.....A.....  
PKZf Va 259 .....VA..E..D.....  
PKZg Va 259 .....VA..E..D.....R.....A.....  
PKZh Vb 245 -----R.....

PKZa Va 345 HRIFYEISSGVEYIHSNNLIHRDLKPDNILFNDGKVKIGDFGLVAAQKNPSGDPIERSKRKGTPTYMSPEQENLRNYDEKTDIFPL  
PKZb Va 345 .....  
PKZc Va 341 .....  
PKZd Va 345 .....  
PKZe Va 345 .....  
PKZf Va 345 .....  
PKZg Va 345 .....  
PKZh Vb 280 .....--.....

PKZa Va 431 GLMWFEMLWKISSGEMERAEIWTNLRNQKLPDQFCERYSAENKFIEKMLSVTPEDRPHAKDIRLNLETFFSLHQNSLSQKTI  
PKZb Va 431 .....T.....  
PKZc Va 427 .....PP.....  
PKZd Va 431 .....P.....V.....  
PKZe Va 431 .....P.....V.....  
PKZf Va 431 .....P.....  
PKZg Va 431 .....  
PKZh Vb 366 .....PP.....
