# Supplementary material
Source: PubMed Central journal article supplement (PMC547857)

# kinetics

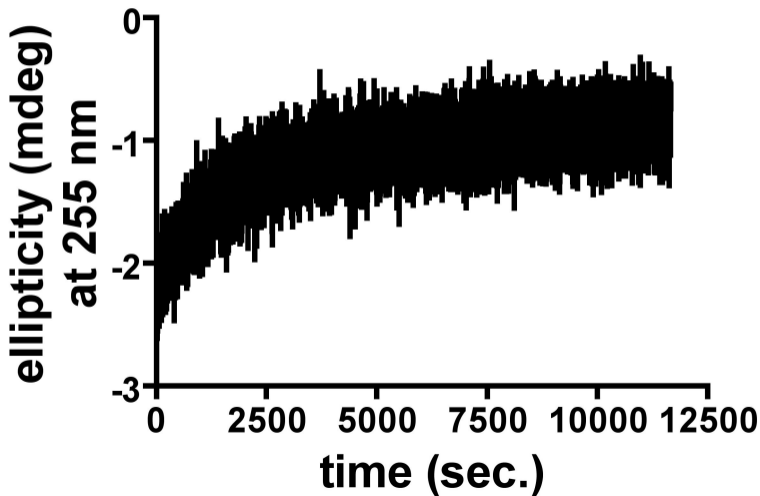

Supplement: pnas_102_5_1602__6.pdf [file pnas_102_5_1602__6.pdf]

40 cy

2000 —

1500 —

1000 —

750 —

500 —

250 —

M

heart  
1

eye  
2

brain  
3

gonads  
4

muscle  
5

skin  
6

dig.org.  
7

liver  
8

spleen  
9

D  
A  
C  
B

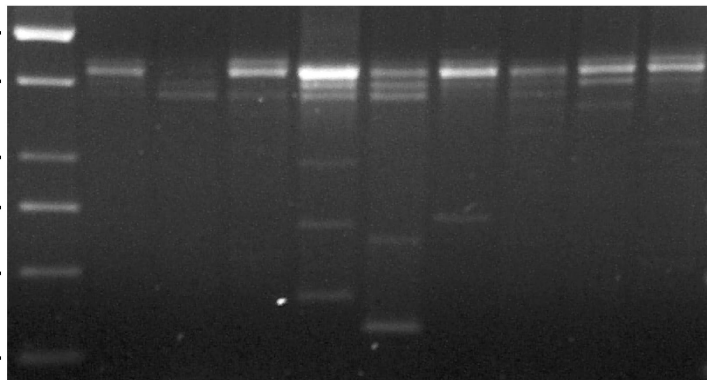

M

1

2

3

4

5

6

7

8

9

1000 —

750 —

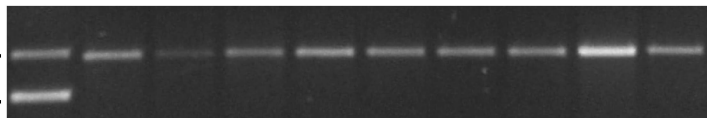

Supplement: pnas_102_5_1602__8.pdf [file pnas_102_5_1602__8.pdf]
